# Supplementary material
Source: PubMed Central journal article supplement (PMC5598143)
Supplement: mmc1.pdf [file mmc1.pdf]

**Supplement Table 1-1. Mortality/Cage Side Observation, male, Phase A**

| Group No.                             | Day 1        |              | Day 2                 |                                     | Day 3        |              | Day4         |
|---------------------------------------|--------------|--------------|-----------------------|-------------------------------------|--------------|--------------|--------------|
|                                       | a.m.         | p.m.         | a.m.                  | p.m.                                | a.m.         | p.m.         | a.m.         |
| Inauhzin-C<br>Group 1/ ♂<br>50 mg/kg  | NAD<br>(3/3) | NAD<br>(3/3) | NAD<br>(3/3)          | NAD<br>(3/3)                        | NAD<br>(3/3) | NAD<br>(3/3) | -            |
| Inauhzin-C<br>Group 2/ ♂<br>150 mg/kg | NAD<br>(3/3) | NAD<br>(3/3) | Piloerection<br>(3/3) | Piloerection<br>(2/3); NAD<br>(1/3) | NAD<br>(3/3) | NAD<br>(3/3) | -            |
| Inauhzin-C<br>Group 3/ ♂<br>250 mg/kg | DMA<br>(3/3) | DMA<br>(3/3) | NAD<br>(3/3)          | NAD<br>(3/3)                        | NAD<br>(3/3) | NAD<br>(3/3) | -            |
| Inauhzin-C<br>Group 4/ ♂<br>200 mg/kg | DMA<br>(3/3) | NAD<br>(3/3) | NAD<br>(3/3)          | NAD<br>(3/3)                        | NAD<br>(3/3) | NAD<br>(3/3) | NAD<br>(3/3) |

**Supplement Table 1-2. Mortality/Cage Side Observation, female, Phase A**

| Group No.                             | Day 1        |              | Day 2                 |                                                          | Day 3               |              | Day4         |
|---------------------------------------|--------------|--------------|-----------------------|----------------------------------------------------------|---------------------|--------------|--------------|
|                                       | a.m.         | p.m.         | a.m.                  | p.m.                                                     | a.m.                | p.m.         | a.m.         |
| Inauhzin-C<br>Group 1/ ♀<br>50 mg/kg  | NAD<br>(3/3) | NAD<br>(3/3) | NAD<br>(3/3)          | NAD<br>(3/3)                                             | NAD<br>(3/3)        | NAD<br>(3/3) | NAD<br>(3/3) |
| Inauhzin-C<br>Group 2/ ♀<br>150 mg/kg | NAD<br>(3/3) | NAD<br>(3/3) | Piloerection<br>(3/3) | Mattered hair<br>(1/3); NAD<br>(2/3)                     | NAD<br>(3/3)        | NAD<br>(3/3) | NAD<br>(3/3) |
| Inauhzin-C<br>Group 3/ ♀<br>250 mg/kg | DMA<br>(3/3) | DMA<br>(3/3) | DMA<br>(3/3)          | DMA (1/3);<br>piloerection<br>(1/3); Found<br>dead (2/3) | Found dead<br>(1/1) | -            | -            |
| Inauhzin-C<br>Group 4/ ♀<br>200 mg/kg | DMA<br>(3/3) | NAD<br>(3/3) | NAD<br>(3/3)          | NAD<br>(3/3)                                             | NAD<br>(3/3)        | NAD<br>(3/3) | NAD<br>(3/3) |

NAD: No Abnormalities Detected

DMA: Decreased Motor Activity

**Supplement Table 2-1. Detailed clinical observation, male, Phase A**

| Group No.              | Day 1        |              | Day 2                                                                      |                                                                                         | Day 3                                    |                                                               | Day 4        |
|------------------------|--------------|--------------|----------------------------------------------------------------------------|-----------------------------------------------------------------------------------------|------------------------------------------|---------------------------------------------------------------|--------------|
|                        | a.m.         | p.m.         | a.m.                                                                       | p.m.                                                                                    | a.m.                                     | p.m.                                                          | a.m.         |
| Group 1/♂<br>50 mg/kg  | NAD<br>(3/3) | NAD<br>(3/3) | NAD<br>(3/3)                                                               | NAD<br>(3/3)                                                                            | NAD<br>(3/3)                             | NAD<br>(3/3)                                                  | NAD<br>(3/3) |
| Group 2/♂<br>150 mg/kg | NAD<br>(3/3) | NAD<br>(3/3) | Piloerection<br>(3/3)                                                      | Piloerection (2/3);<br>NAD (1/3)                                                        | NAD<br>(3/3)                             | NAD<br>(3/3)                                                  | NAD<br>(3/3) |
| Group 3/♂<br>250 mg/kg | NAD<br>(3/3) | DMA<br>(3/3) | DMA (3/3); discharge,<br>both eyes (1/3); both<br>eyes partly closed (1/3) | DMA (3/3);<br>piloerection (3/3);<br>discharge, both eyes<br>(1/3); cold to touch (1/3) | NAD (2/3); discharge,<br>right eye (1/3) | NAD (1/3); staining<br>around anus (1/3); soft<br>stool (1/3) | NAD<br>(3/3) |
| Group 4/♂<br>200 mg/kg | NAD<br>(3/3) | DMA<br>(3/3) | NAD<br>(3/3)                                                               | NAD<br>(3/3)                                                                            | NAD<br>(3/3)                             | NAD<br>(3/3)                                                  | NAD<br>(3/3) |

**Supplement Table 2-2. Detailed clinical observation, female, Phase A**

| Group No.              | Day 1        |              | Day 2                                                                         |                                                                                                                        | Day 3                                                                                                               |                                                                                  | Day 4            |
|------------------------|--------------|--------------|-------------------------------------------------------------------------------|------------------------------------------------------------------------------------------------------------------------|---------------------------------------------------------------------------------------------------------------------|----------------------------------------------------------------------------------|------------------|
|                        | a.m.         | p.m.         | a.m.                                                                          | p.m.                                                                                                                   | a.m.                                                                                                                | p.m.                                                                             | a.m.             |
| Group 1/♀<br>50 mg/kg  | NAD<br>(3/3) | NAD<br>(3/3) | NAD<br>(3/3)                                                                  | NAD<br>(3/3)                                                                                                           | NAD<br>(3/3)                                                                                                        | NAD<br>(3/3)                                                                     | NAD<br>(3/3)     |
| Group 2/♀<br>150 mg/kg | NAD<br>(3/3) | NAD<br>(3/3) | Piloerection<br>(3/3)                                                         | Hair staining, around anus<br>(1/3); NAD (2/3)                                                                         | NAD<br>(3/3)                                                                                                        | NAD<br>(3/3)                                                                     | NAD<br>(3/3)     |
| Group 3/♀<br>250 mg/kg | NAD<br>(3/3) | DMA<br>(3/3) | DMA (3/3);<br>discharge, both eyes<br>(1/3); both eyes<br>partly closed (1/3) | DMA (3/3); Piloerection<br>(3/3); discharge, both eyes<br>(3/3); both eyes partly closed<br>(2/3); cold to touch (3/3) | DMA (3/3); Piloerection<br>(1/3); discharge, both eyes<br>(2/3); eye(s) partly closed<br>(2/3); cold to touch (3/3) | Found dead (2/3);<br>DMA (1/3);<br>piloerection (1/3);<br>deep respiration (1/3) | Found dead (1/1) |
| Group 4/♀<br>200 mg/kg | NAD<br>(3/3) | DMA<br>(3/3) | NAD<br>(3/3)                                                                  | NAD<br>(3/3)                                                                                                           | NAD<br>(3/3)                                                                                                        | NAD<br>(3/3)                                                                     | NAD<br>(3/3)     |

NAD: No Abnormalities Detected

DMA: Decreased Motor Activity

**Supplement Table 3-1. Necropsy Findings, male, Phase A**

| Group No                     | Animal No | External Examination | Internal Examination                                                                      | Necropsy Date |
|------------------------------|-----------|----------------------|-------------------------------------------------------------------------------------------|---------------|
| Inauhzin-C<br>♂<br>50 mg/kg  | 1101      | Normal               | Normal                                                                                    | Day 4         |
|                              | 1102      | Normal               | Normal                                                                                    | Day 4         |
|                              | 1103      | Normal               | Normal                                                                                    | Day 4         |
| Inauhzin-C<br>♂<br>150 mg/kg | 1201      | Normal               | Normal                                                                                    | Day 4         |
|                              | 1202      | Normal               | Normal                                                                                    | Day 4         |
|                              | 1203      | Normal               | Normal                                                                                    | Day 4         |
| Inauhzin-C<br>♂<br>250 mg/kg | 1301      | Normal               | White substance adhered to the surface of liver and diaphragm, large quantity             | Day 4         |
|                              | 1301      | Normal               | White substance adhered to the surface of liver and diaphragm, large quantity             | Day 4         |
|                              | 1301      | Normal               | White substance adhered to the surface of liver and diaphragm, large quantity             | Day 4         |
| Inauhzin-C<br>♂<br>200 mg/kg | 1401      | Normal               | White substance adhered to the surface of liver, spleen and diaphragm                     | Day 5         |
|                              | 1402      | Normal               | White substance adhered to the surface of liver, spleen and diaphragm                     | Day 5         |
|                              | 1403      | Normal               | White substance adhered to the surface of liver and diaphragm; adhesion-stomach and liver | Day 5         |

**Supplement Table 3-2. Necropsy Findings, female, Phase A**

| Group No                     | Animal No | External Examination | Internal Examination                                                                                                                                                                                                                                   | Necropsy Date |
|------------------------------|-----------|----------------------|--------------------------------------------------------------------------------------------------------------------------------------------------------------------------------------------------------------------------------------------------------|---------------|
| Inauhzin-C<br>♀<br>50 mg/kg  | 2101      | Normal               | Normal                                                                                                                                                                                                                                                 | Day 4         |
|                              | 2102      | Normal               | Normal                                                                                                                                                                                                                                                 | Day 4         |
|                              | 2103      | Normal               | Normal                                                                                                                                                                                                                                                 | Day 4         |
| Inauhzin-C<br>♀<br>150 mg/kg | 2201      | Normal               | Normal                                                                                                                                                                                                                                                 | Day 4         |
|                              | 2202      | Normal               | Normal                                                                                                                                                                                                                                                 | Day 4         |
|                              | 2203      | Normal               | Normal                                                                                                                                                                                                                                                 | Day 4         |
| Inauhzin-C<br>♀<br>250 mg/kg | 2301      | Normal               | Duodenum-partly autolysis, with content in, dark red; spleen-small, ~1/3 of normal size; liver-discoloration, light; white substance adhered to the surface of liver and spleen; liquid observed in the thoracic cavity, large volume                  | Day 3         |
|                              | 2301      | Normal               | Duodenum-with content in, dark red; spleen-small, ~1/3 of normal size; stomach-gaseous distension; liver-partly discoloration, light; white substance adhered to the surface of liver and spleen; liquid observed in the thoracic cavity, large volume | Day 2         |
|                              | 2301      | Normal               | Duodenum-with content in, dark red; spleen-small, ~1/2 of normal size; liver-discoloration, light with white substance adhered to the surface; liquid observed in the thoracic cavity, large volume                                                    | Day 2         |
| Inauhzin-C<br>♀<br>200 mg/kg | 2401      | Normal               | Adhesion-stomach and liver; white substance adhered to liver, diaphragm and mesentery                                                                                                                                                                  | Day 5         |
|                              | 2402      | Normal               | White substance adhered to liver and diaphragm                                                                                                                                                                                                         | Day 5         |
|                              | 2403      | Normal               | White substance adhered to liver and diaphragm                                                                                                                                                                                                         | Day 5         |

**Supplement Table 4(5). Necropsy Findings, female, Phase B**

| <b>Group No</b>                   | <b>Animal No</b> | <b>External findings</b> | <b>Internal findings</b>                                                                                                                                                                                                                                                                          | <b>Necropsy Date</b> |
|-----------------------------------|------------------|--------------------------|---------------------------------------------------------------------------------------------------------------------------------------------------------------------------------------------------------------------------------------------------------------------------------------------------|----------------------|
| Control/♀<br>0 mg/kg              | 21001            | NAD                      | NAD                                                                                                                                                                                                                                                                                               | Day 7                |
|                                   | 21002            | NAD                      | NAD                                                                                                                                                                                                                                                                                               | Day 7                |
|                                   | 21003            | NAD                      | NAD                                                                                                                                                                                                                                                                                               | Day 7                |
|                                   | 21004            | NAD                      | NAD                                                                                                                                                                                                                                                                                               | Day 7                |
|                                   | 21005            | NAD                      | NAD                                                                                                                                                                                                                                                                                               | Day 7                |
|                                   | 21006            | NAD                      | NAD                                                                                                                                                                                                                                                                                               | Day 7                |
| Inauhzin-C<br>Low/♀<br>30 mg/kg   | 22001            | NAD                      | Wall of duodenum- thin                                                                                                                                                                                                                                                                            | Day 7                |
|                                   | 22002            | NAD                      | NAD                                                                                                                                                                                                                                                                                               | Day 7                |
|                                   | 22003            | NAD                      | Discoloration at head of spleen, dark                                                                                                                                                                                                                                                             | Day 7                |
|                                   | 22004            | NAD                      | NAD                                                                                                                                                                                                                                                                                               | Day 7                |
|                                   | 22005            | NAD                      | NAD                                                                                                                                                                                                                                                                                               | Day 7                |
|                                   | 22006            | NAD                      | Spleen enlargement                                                                                                                                                                                                                                                                                | Day 7                |
| Inauhzin-C<br>Mid/♀<br>60 mg/kg   | 23001            | NAD                      | NAD                                                                                                                                                                                                                                                                                               | Day 7                |
|                                   | 23002            | NAD                      | Spleen enlargement                                                                                                                                                                                                                                                                                | Day 7                |
|                                   | 23003            | NAD                      | NAD                                                                                                                                                                                                                                                                                               | Day 7                |
|                                   | 23004            | NAD                      | Discoloration at head of spleen, dark                                                                                                                                                                                                                                                             | Day 7                |
|                                   | 23005            | NAD                      | NAD                                                                                                                                                                                                                                                                                               | Day 7                |
|                                   | 23006            | NAD                      | NAD                                                                                                                                                                                                                                                                                               | Day 7                |
| Inauhzin-C<br>High/♀<br>120 mg/kg | 24001            | NAD                      | White particles on the abdominal wall, mesentery, liver and diaphragma; edge of liver lobes-blunt; wall of duodenum-thin; liver-adhered to stomach and duodenum; spleen-large                                                                                                                     | Day 7                |
|                                   | 24002            | NAD                      | White particles on the abdominal wall, mesentery, liver and diaphragma; edge of liver lobes-blunt; wall of duodeneum-thin; liver-adhered to stomach, right kidney and duodenum; spleen-large and blunt at the edge                                                                                | Day 7                |
|                                   | 24003            | NAD                      | Liquid observed in abdominal cavity, large volume; white particles on the abdominal wall, mesentery, liver and diaphragma; edge of liver lobes-blunt; wall of duodeneum-thin; liver-adhered to stomach and duodenum; spleen-large; liquid in the duodenum, yellow, thick                          | Day 7                |
|                                   | 24004            | NAD                      | White particles on the abdominal wall, mesentery, liver and diaphragma; edge of liver lobes-blunt; wall of duodenum-thin; liver-adhered to stomach, spleen, right kidney and duodenum                                                                                                             | Day 7                |
|                                   | 24005            | NAD                      | Liquid observed in abdominal cavity, small volume; white particles on the abdominal wall, mesentery, liver and diaphragma; edge of liver lobes-blunt; wall of duodenum-thin; liver-adhered to stomach and duodenum; spleen-large and blunt at the edge; liquid in the duodenum, light brown thick | Day 7                |
|                                   | 24006            | NAD                      | White particles on the abdominal wall, mesentery, liver and diaphragma; edge of liver lobes-blunt; liver-adhered to abdominal wall                                                                                                                                                                | Day 7                |

**Supplement Table 5 (6). Histopathology**

| Group No             | Animal NO. | Brain                                  | Heart  | Kidneys                                                       | Ovaries | Adrenal glands | Liver                                                                                   | Lung   | Spleen | Uterus |
|----------------------|------------|----------------------------------------|--------|---------------------------------------------------------------|---------|----------------|-----------------------------------------------------------------------------------------|--------|--------|--------|
| Control/♀<br>0 mg/kg | 21001      | Brainstem hemorrhage                   | Normal | Cortex renal tubular epithelial cells undergoing degeneration | Normal  | Normal         | Infiltration of focal inflammatory cells mainly macrophage                              | Normal | Normal | Normal |
|                      | 21002      | Hemorrhage in parenchyma               | Normal | Cortex renal tubular epithelial cells undergoing degeneration | Normal  | Normal         | Infiltration of focal inflammatory cells mainly macrophages and neutrophils             | Normal | Normal | Normal |
|                      | 21003      | Hemorrhage in parenchyma               | Normal | Cortex renal tubular epithelial cells undergoing degeneration | Normal  | Normal         | Normal                                                                                  | Normal | Normal | Normal |
| Low/♀<br>30 mg/kg    | 24001      | Hemorrhage in parenchyma               | Normal | Cortex renal tubular epithelial cells undergoing degeneration | Normal  | Normal         | Normal                                                                                  | Normal | Normal | Normal |
| Mid/♀<br>60 mg/kg    | 24002      | Hemorrhage in parenchyma               | Normal | Cortex renal tubular epithelial cells undergoing degeneration | Normal  | Normal         | The hepatic capsule thickening within inflammatory cell infiltration mainly neutrophils | Normal | Normal | Normal |
| High/♀<br>120 mg/kg  | 24003      | Parenchyma and subarachnoid hemorrhage | Normal | Cortex renal tubular epithelial cells undergoing degeneration | Normal  | Normal         | Normal                                                                                  | Normal | Normal | Normal |
